# Supplementary material for: SLR1 inhibits MOC1 degradation to coordinate tiller number and plant height in rice
Source: PubMed Central journal article supplement (PMC6588547; doi:10.1038/s41467-019-10667-2), 2019-06-21
Supplement: 41467_2019_10667_MOESM1_ESM.pdf [file 41467_2019_10667_MOESM1_ESM.pdf]

## Supplementary Information

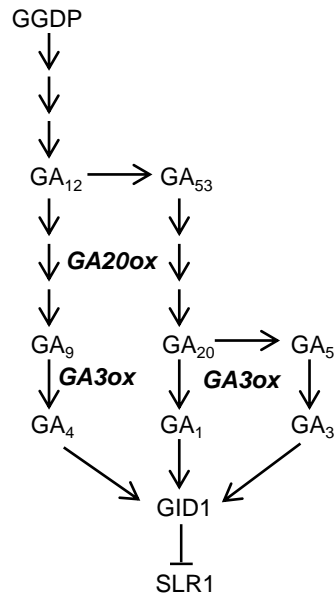

**Supplementary Figure 1. Schematic diagram of GA biosynthesis and signaling pathways.**

*GA3ox*, GA 3-oxidase; *GA20ox*, GA20-oxidase; GGDP, geranylgeranyl diphosphate; GID1, GIBBERELLIN-INSENSITIVE DWARF 1; SLR1, SLENDER RICE 1.

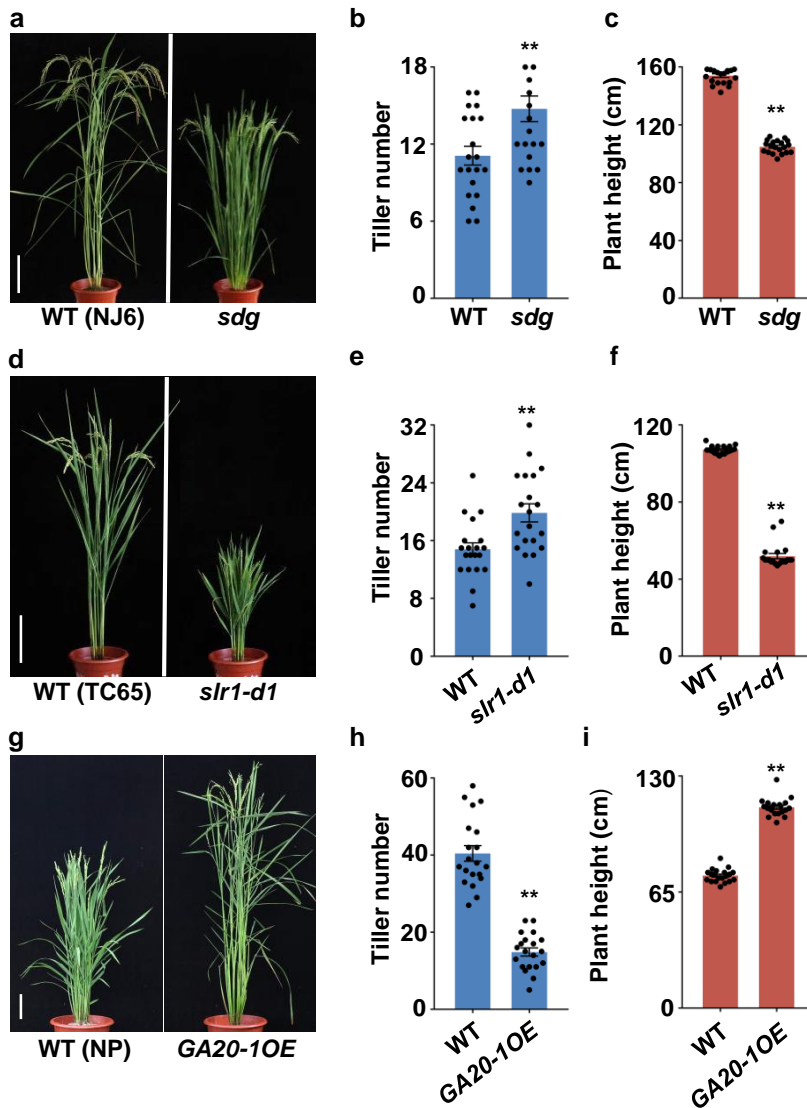

**Supplementary Figure 2. Tiller number is negatively correlated with plant height in GA-related mutants and transgenic plants.**

(a) Appearance of the WT and *sdg* mutant at the heading stage. Scale bar, 20 cm. (b) and (c) Quantification of the tiller number and plant height shown in (a). Asterisks indicate significant difference to WT. (d) Appearance of the WT and *slr1-d1* mutant at the heading stage. Scale bar, 20 cm. (e) and (f) Quantification of the tiller number and plant height shown in (d). (g) Appearance of the WT and *GA20ox-1* overexpressing (*GA20-1OE*) transgenic plants at the heading stage. Scale bar, 20 cm. (h) Tiller number and (i) height of the plants shown in (g). Asterisks indicate significant difference to the WT (two-tailed Student's *t*-test, \*\**p* < 0.01; mean ± s.e.m., n = 20 in (b), (c), (e), (f), (h), and (i)). Source data are provided as a Source Data file.

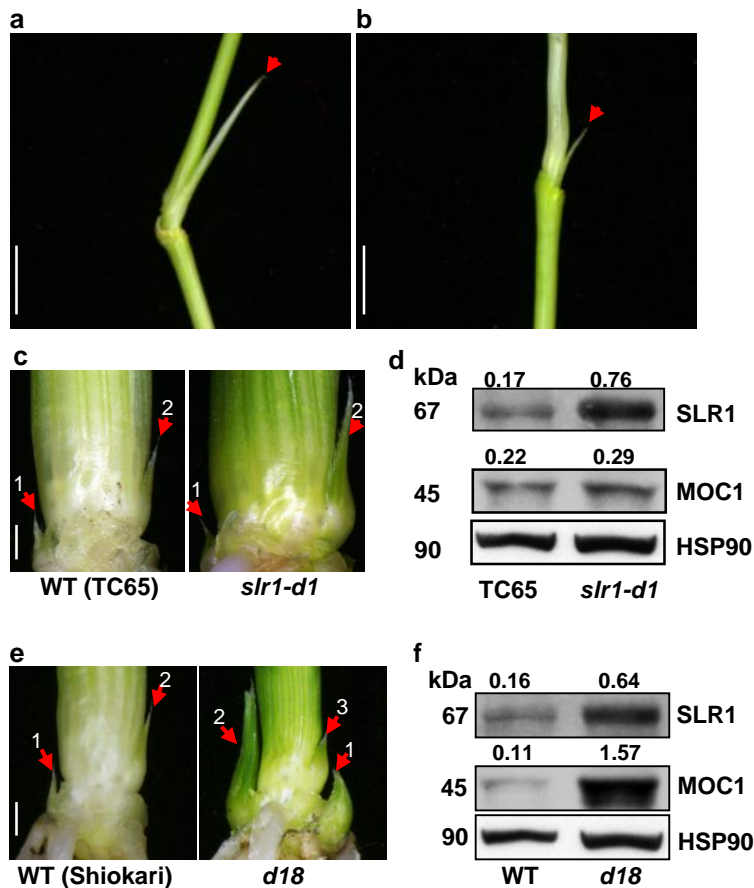

**Supplementary Figure 3. Axillary buds and MOC1 protein in GA-related mutants.**

(a) Third and (b) fourth axillary buds of *slr1*. Arrows indicate axillary buds. Scale bar, 1 mm. (c) Dissections of the WT (TC65) and *slr1-d1* seedlings at 30 days after germination (DAG). Arrows indicate axillary buds. Scale bar, 1 mm. (d) Protein levels of SLR1 and MOC1 in extracts of shoot bases (0 to 0.5 cm) of the WT and *slr1-d1* seedlings, determined by protein immunoblotting. HSP90, loading control. Values above panels indicate signal strength for SLR1 and MOC1 in arbitrary units determined by densitometry. (e) View of shoot base of the WT (Shiokari) and *d18* seedlings at 30 DAG. Arrows indicate axillary buds. Scale bar, 1 mm. (f) Protein levels of SLR1 and MOC1 in extracts of the WT and *d18* seedlings, determined by protein immunoblotting. HSP90, loading control. Values above panels indicate signal strength for SLR1 and MOC1 in arbitrary units determined by densitometry. The full scans of immunoblots are shown in Supplementary Fig. 12.

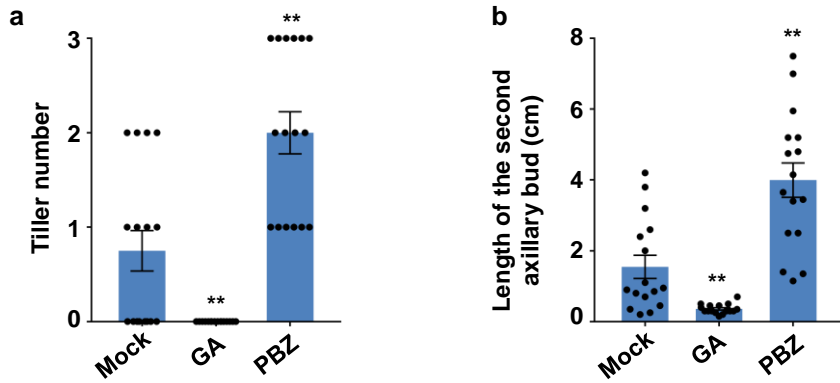

**Supplementary Figure 4. Effect of GA and PBZ treatments on tiller bud outgrowth.**

(a) Quantification of the tiller number shown in Fig 2 (e). Asterisks indicate significant difference to the WT. (b) Length of the second axillary buds shown in Fig 2 (e).

Asterisks indicate significant difference to the WT (two-tailed Student's *t*-test, \*\* $p < 0.01$ ; mean  $\pm$  s.e.m.,  $n = 16$ ). Source data are provided as a Source Data file.

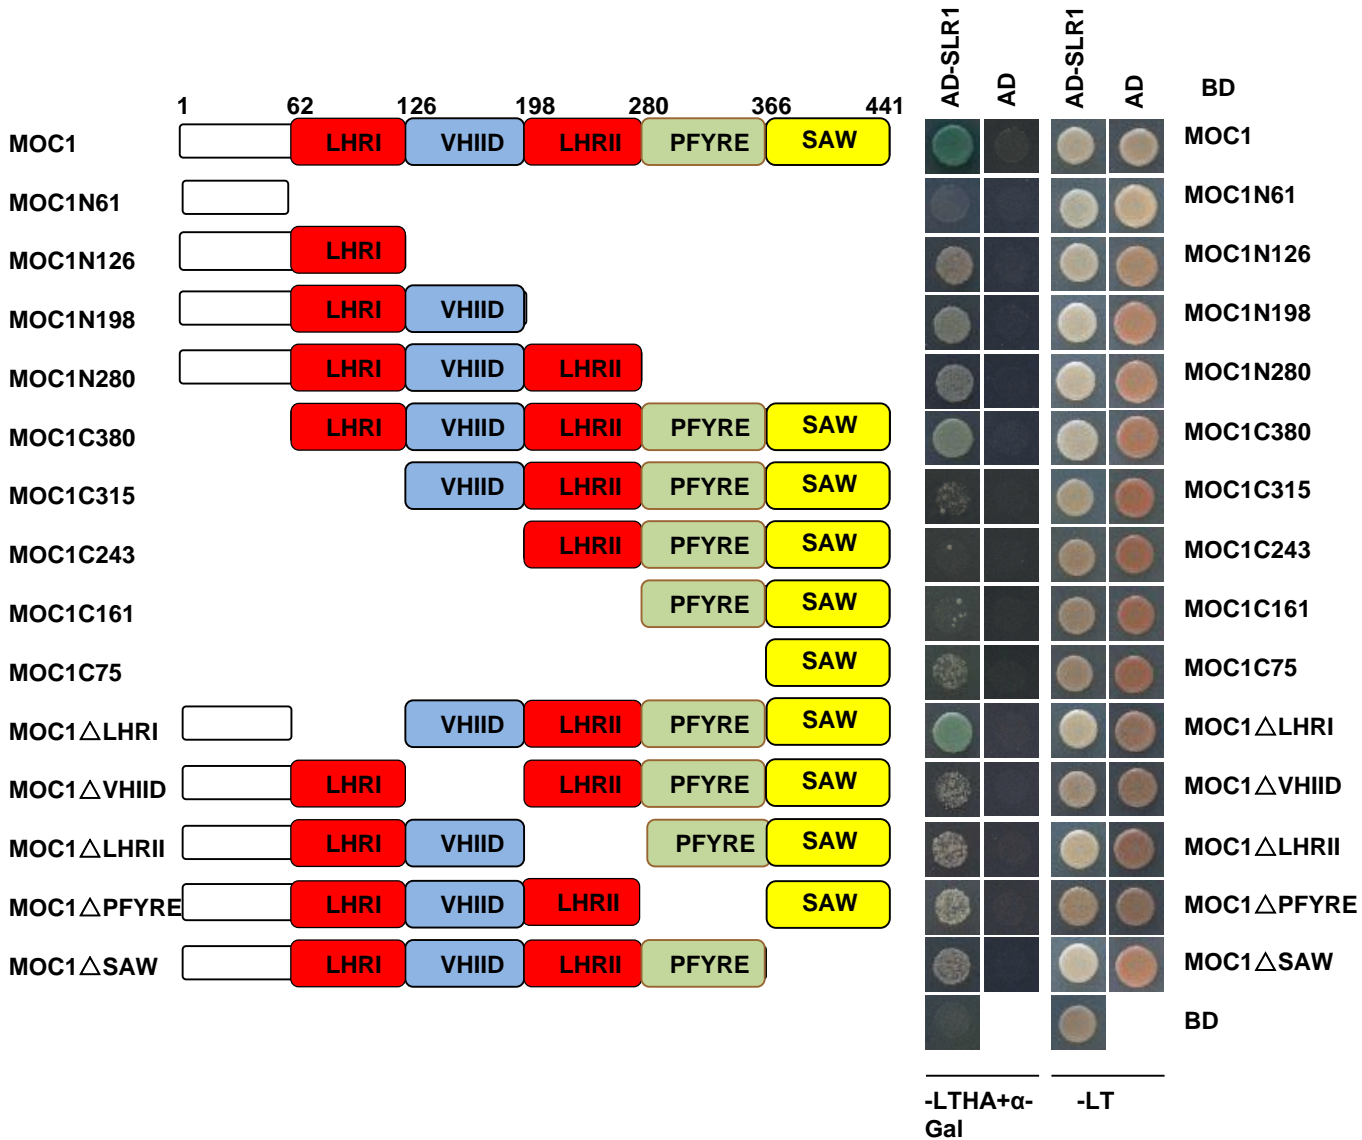

**Supplementary Figure 5. *In vitro* Y2H assay showing MOC1 motifs interacting with SLR1.**

(left) Schematic representation of MOC1 and its conserved motifs shown by color: Red, LHRI or LHRII; blue, VHIID; green, PFYRE; and yellow, SAW. Numbers at the top indicate the position of amino acids.

(right) Y2H analyses of the interactions between SLR1 and MOC1 derived proteins shown in (left).

Transformed yeast cells were grown on synthetic complete medium lacking Trp and Leu (-LT), or synthetic complete medium lacking Trp, Leu, His and Ade (-LTHA);  $\alpha$ -Gal, 5-Bromo-4-chloro-3-indoxyl- $\alpha$ -D-galactopyranoside. The -LTHA+ $\alpha$ -Gal medium contained 40  $\mu\text{g}\cdot\text{mL}^{-1}$  X- $\alpha$ -Gal. AD, GAL4 activation domain; BD, GAL4 DNA binding domain. Triangles indicate deletion.

a

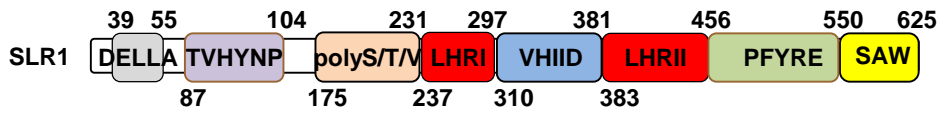

b

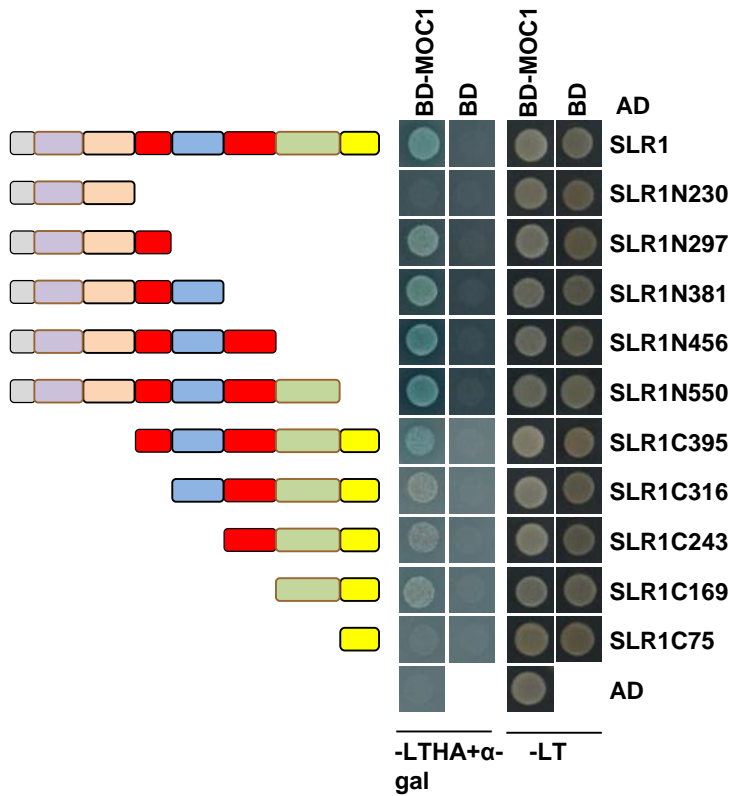

c

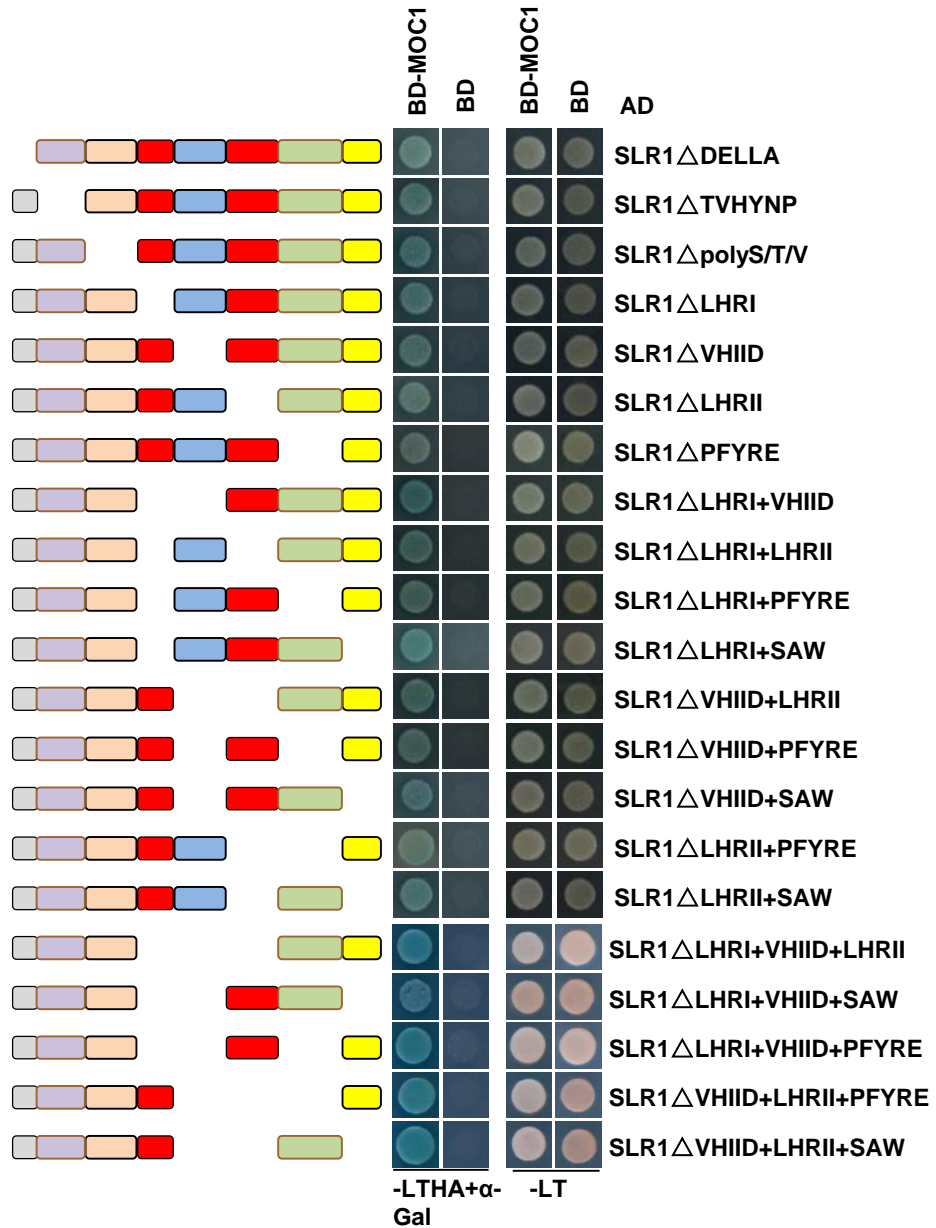

**Supplementary Figure 6. *In vitro* Y2H assays showing SLR1 motifs interacting with MOC1.**

(a) Schematic representation of SLR1 and its conserved motifs shown by color: Gray, DELLA; purple, TVHYNP; orange, polyS/T/V; red, LHRI or LHR II; blue, VHIID; green, PFYRE and yellow, SAW. Numbers at the top indicate the position of amino acids. (b) Y2H analyses of the interaction between MOC1 and derivatives of SLR1 shown in the left. (c) Y2H analyses of the interaction between MOC1 and derivatives of SLR1 shown in the left. Transformed yeast cells were grown on synthetic complete medium lacking Trp and Leu (-LT), or synthetic complete medium lacking Trp, Leu, His and Ade (-LTHA); α-Gal, 5-Bromo-4-chloro-3-indoxyl-α-D-galactopyranoside, which is a chromogenic substrate for α-galactosidase. The -LTHA+α-Gal medium contained 40 μg·mL<sup>-1</sup> X-α-Gal. AD, GAL4 activation domain; BD, GAL4 DNA binding domain. Triangles indicate deletion.

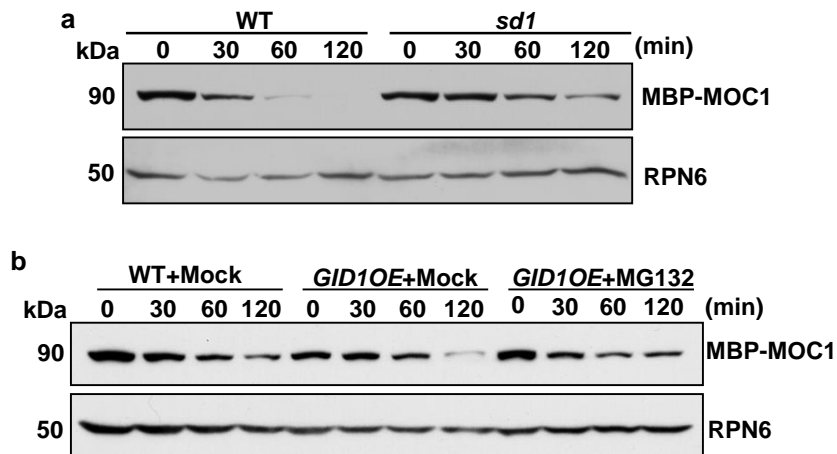

**Supplementary Figure 7. The degradation of MOC1 is affected by GA biosynthesis signaling and MG132.**

(a) *In vitro* cell-free protein degradation assay, showing degradation of MBP-MOC1 in extracts from the WT and *sd1*. Immunoblots were probed with anti-MBP ( $\alpha$ -MBP). Ribosomal protein 6 (RPN6), loading control. (b) *In vitro* cell-free protein degradation assay, showing MG132 could partially inhibit the degradation of MBP-MOC1 in extracts from *GID1OE* transgenic plants. Immunoblots were probed as in (a). Source data are provided as a Source Data file.



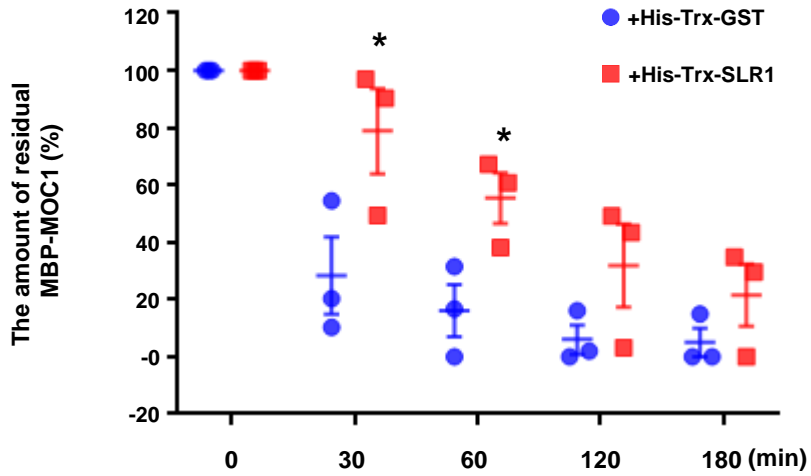

**Supplementary Figure 8. His-Trx-SLR1 inhibits the degradation of MOC1 in cell-free protein degradation assay.**

Relative amounts of proteins in Fig. 4c and other two biological replicates were determined by densitometry normalized to RPN6. Asterisks indicate significant difference between +His-Trx-GST and +His-Trx-SLR1 at each time point (two-tailed Student's *t*-test, \* $p < 0.05$ ; mean  $\pm$  s.e.m.,  $n = 3$ ). Source data are provided as a Source Data file.

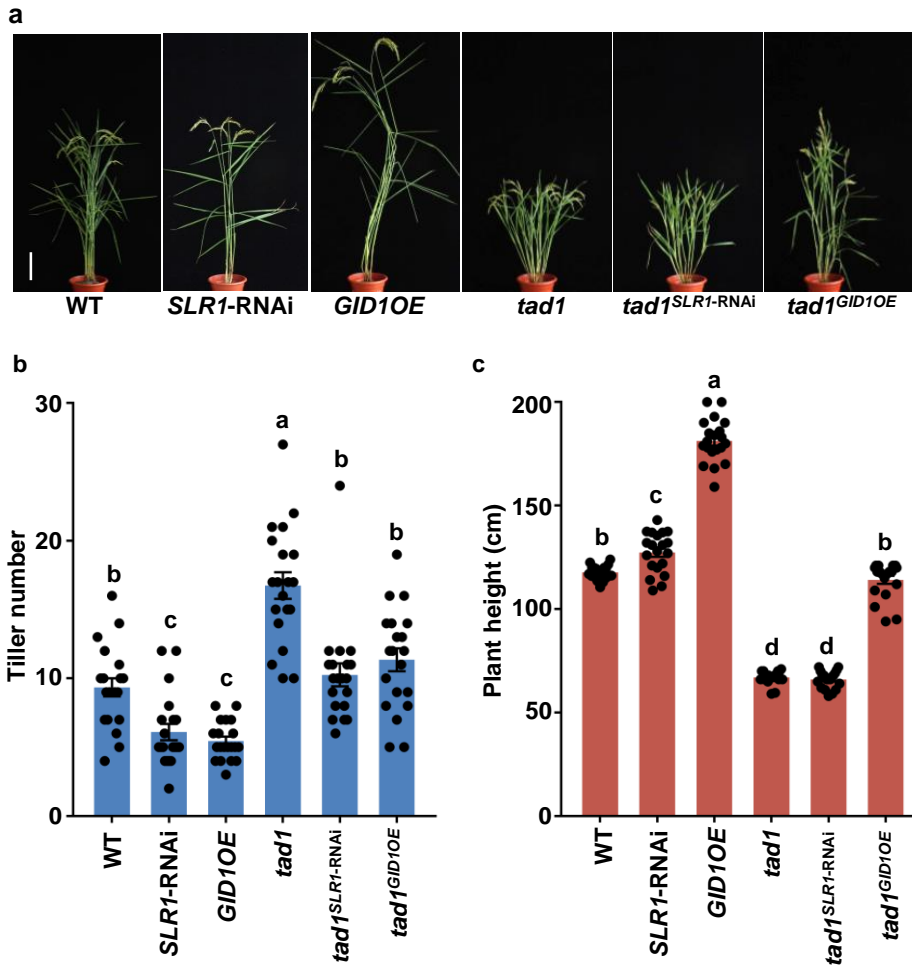

**Supplementary Figure 9. Knock-down *SLR1* and overexpressing-*GID1* can rescue the tiller number of *tad1*.**

(a) Phenotypes of *SLR1*-RNAi, *GID1OE* in the WT (LS), and *tad1* at the heading stage. Scale bar, 20 cm. (b) Tiller number and (c) height of plants shown in (a). Different lowercase letters indicate significant differences (Tukey's HSD test.  $p < 0.05$ ; mean  $\pm$  s.e.m.,  $n = 20$ ). Source data are provided as a Source Data file.

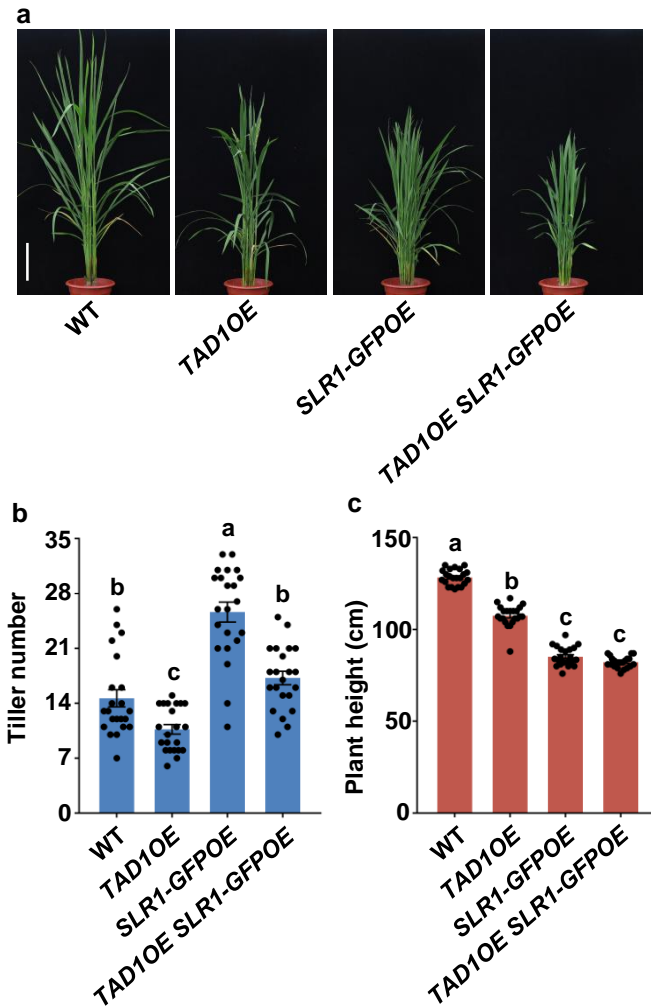

**Supplementary Figure 10. Analysis phenotypes of *TAD1OE SLR1-GFPOE*.**

(a) Phenotypes of WT (LS), *TAD1OE*, *SLR1-GFPOE* and *TAD1OE SLR1-GFPOE*

plants. Scale bar, 20 cm. (b) Tiller number and (c) height of plants shown in (a).

Different lowercase letters indicate significant differences (Tukey's HSD test,  $p < 0.05$ ;

mean  $\pm$  s.e.m.,  $n = 22$ ). Source data are provided as a Source Data file.

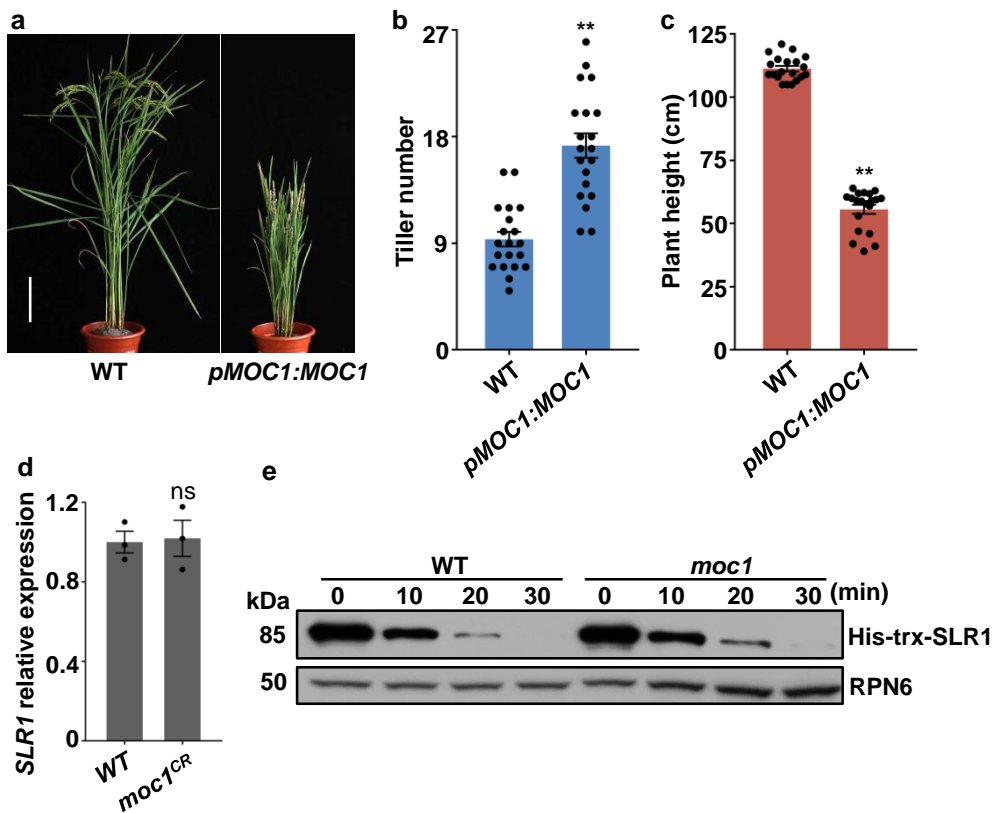

**Supplementary Figure 11. MOC1 regulates plant height not through mediating SLR1 transcription or degradation.**

(a) Phenotypes of WT (LS) and *pMOC1:MOC1* plants at the heading stage. Scale bar, 20 cm. (b) Tiller number and (c) height of plants shown in (a). Asterisks indicate significant difference to the WT (two-tailed Student's *t*-test,  $**p < 0.01$ ; mean  $\pm$  s.e.m.,  $n = 20$ ). (d) The expression level of *SLR1* in shoot bases (0 to 0.5 cm) in one-month-old seedlings of WT and *moc1<sup>CR</sup>*. The ns indicates no significant difference to WT (two-tailed Student's *t*-test; mean  $\pm$  s.e.m.,  $n = 3$ ). (e) Degradation of His-trx-SLR1 in WT and *moc1*. RPN6, loading control. Source data are provided as a Source Data file.

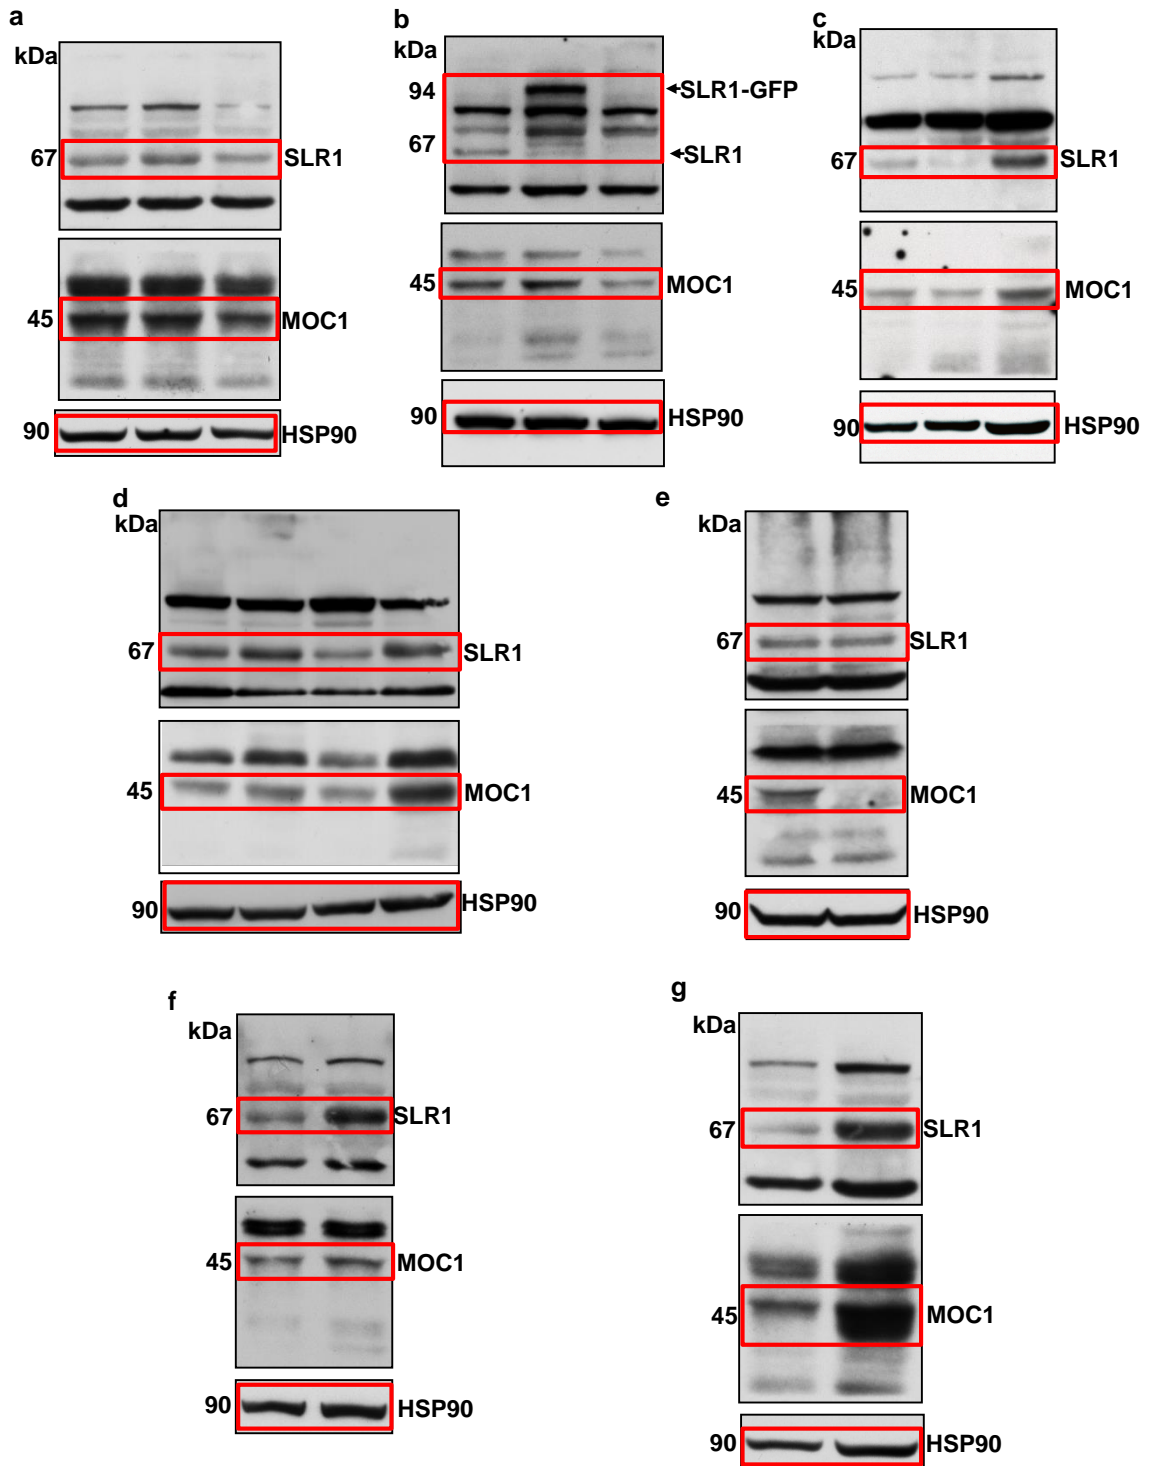

**Supplementary Figure 12. Full scans of immunoblots in Figures 2b (a), 2d (b), 2f (c), 4g (d), 5a (e) and Supplementary Figure 3b (f), 3f (g).**

Molecular weight markers are indicated in kDa.

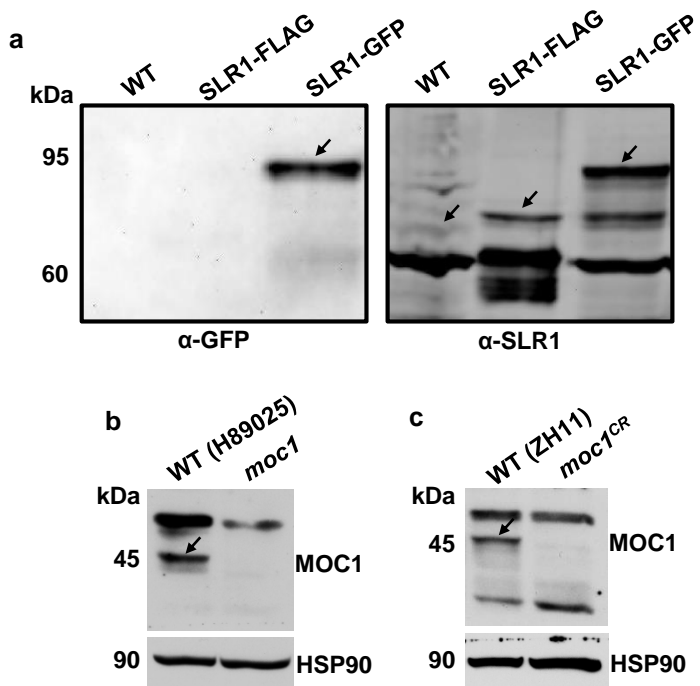

**Supplementary Figure 13. Determination of SLR1 and MOC1 antibody specificity.**

(a) Determination of SLR1 antibody specificity by SLR1-FLAG and SLR1-GFP protein extracts from rice protoplasts. Right, anti-SLR1 (1:1,000); left, anti-GFP (1:5,000). (b) and (c) Determination of MOC1 antibody specificity using protein extracts from *moc1* and *moc1<sup>CR</sup>* mutants.

**Supplementary Table 1. Information of the mutants and the transgenic plants used in this study.**

| Name                     | Wild-type | Information                                                             |
|--------------------------|-----------|-------------------------------------------------------------------------|
| <i>d18</i>               | Shi.      | <i>dwarf18</i> with defective <i>GA3ox-2</i>                            |
| <i>GA20-1OE</i>          | Nip.      | <i>GA20ox-1</i> overexpression plant                                    |
| <i>sdg</i>               | NJ6       | <i>gid1</i> with point mutation cDNA G (493) to A in <i>GID1</i>        |
| <i>slr1-d1</i>           | TC65      | <i>slender</i> with cDNA T (317) to A in <i>SLR1</i>                    |
| <i>moc1</i>              | H89025    | <i>moc1</i> with 1.9-kb retrotransposon insertion at 948 of <i>MOC1</i> |
| <i>gid1<sup>CR</sup></i> | ZH11      | <i>gid1</i> with 1-bp insertion at 103 of <i>GID1</i>                   |
| <i>moc1<sup>CR</sup></i> | ZH11      | <i>moc1</i> with 1-bp deletion at 654 of <i>MOC1</i>                    |
| <i>sd1</i>               | ZH11      | <i>semi-dwarf1</i> with 7-bp deletion at 546-552 of <i>GA20ox-2</i>     |
| <i>slr1</i>              | ZH11      | <i>slender</i> with cDNA T (737) to C in <i>SLR1</i>                    |
| <i>GID1OE</i>            | LS        | <i>GID1</i> overexpression plant                                        |
| <i>pMOC1:MOC1</i>        | LS        | <i>MOC1</i> overexpression plant                                        |
| <i>SLR1-GFPOE</i>        | LS        | <i>SLR1</i> overexpression plant                                        |
| <i>SLR1-RNAi</i>         | LS        | <i>SLR1</i> knock-down plant                                            |
| <i>tad1</i>              | LS        | <i>tad1</i> with point mutation cDNA G (717) to A in <i>TAD1</i>        |
| <i>TAD1OE</i>            | LS        | <i>TAD1</i> overexpression plant                                        |

Abbreviations: Shi., Shiokari; Nip., Nipponbare; NJ6, Nanjing6; TC65, Taichang65; ZH11, Zhonghua11; LS, Lansheng.

**Supplementary Table 2. Primers used in this study.**

| <b>Construct</b>        | <b>Primer</b>  | <b>Sequence (5'-3')</b>               |
|-------------------------|----------------|---------------------------------------|
| <i>SLR1-GFPOE</i>       | SLR1-GFPOESmaF | TCCCCCGGGCATGAAGCGCGAGTACCAA          |
|                         | SLR1-GFPOEXbaR | GCTCTAGACGCCGCGGCGACGCGCCATG          |
| <i>SLR1-RNAi</i>        | SLR1-RNAiBamF  | GCGCGGATCCCGCAGCCGGACGAGACCGACGCCTTGC |
|                         | SLR1-RNAiKpnR  | GCGGTACCAGCTCGGCCTGGCCGGAGCT          |
|                         | SLR1-RNAiSacF  | GCGCGAGCTCCGCAGCCGGACGAGACCGACGCCTTGC |
|                         | SLR1-RNAiSpeR  | GACTAGTAGCTCGGCCTGGCCGGAGCT           |
| <i>GID1OE</i>           | GID1OE-BamHF   | CGGGATCCATGGCCGGCAGCGACGAGGTCAA       |
|                         | GID1OE-SpeR    | GACTAGTCTAGTAGTAGAGTTAGCGTTGA         |
| <i>Anti-SLR1</i>        | Anti-SLR1HindF | CCCAAGCTTATGAAGCGCGAGTACCAAGAAG       |
|                         | Anti-SLR1EcoRR | GGAATTCACATGGCGCCGCCCTGGGACGCGGCCAG   |
| <i>CC-SLR1/35S-SLR1</i> | 35S-SLR1XbaF   | GCTCTAGAATGAAGCGCGAGTACCAAGA          |
|                         | 35S-SLR1KpnR   | GGGGTACCCGCCGCGGCGACGCGCCATG          |
| <i>AD-SLR1</i>          | AD-SLR1NdeF    | GGAATTCATATGATGAAGCGCGAGTACCAAGAAG    |
|                         | AD-SLR1EcoRR   | GGAATTCGCCGCGGGCGACGCGCCA             |
| <i>BD-MOC1</i>          | BD-MOC1F       | CGGGATCCATGCTCCGGTCACTCCACTC          |
|                         | BD-MOC1R       | CGGAATTCCTACGACGACGACGGGTGCCAC        |
| <i>MBP-MOC1</i>         | MBP-MOCEcoRF   | CCCGAATTCATGCTCCGGTCACTCCACTC         |
|                         | MBP-MOCHindR   | CCCGGTACCCTACGACGACGACGGGTGCC         |
| <i>BD-MOC1N61</i>       | MOC1N61R       | CGGGATCCCAGCAGGTCCGCGCACGC            |
| <i>BD-MOC1N126</i>      | MOC1N126R      | CGGGATCCCCGCCCGGACGACGCCGG            |
| <i>BD-MOC1N198</i>      | MOC1N198R      | GGGGTACCGGCGCCGGCGCCGGTACGCGGACCT     |
| <i>BD-MOC1N280</i>      | MOC1N280R      | CGGGATCCGTGGCCGGCCAGGTTGTG            |
| <i>BD-MOC1N366</i>      | MOC1N366R      | CGGGATCCGGAGGGGCCACCGCGGC             |
| <i>BD-MOC1C380</i>      | MOC1C380F      | GGAATTCAGAGGGGGGACCTGCCG              |
| <i>BD-MOC1C315</i>      | MOC1C315F      | GGAATTCAGAGGGGGGACCTGCCG              |
| <i>BD-MOC1C243</i>      | MOC1C243F      | GGAATTCGACCGCGACACCCTCCTC             |
| <i>BD-MOC1C161</i>      | MOC1C161F      | GGAATTCGACGAGCTCGCCCGTTC              |
| <i>BD-MOC1C75</i>       | MOC1C75F       | GGAATTCGGCGGCCGGTGGTGGCGC             |
| <i>BDΔMOC1ΔLHRI</i>     | MOC1ΔLHR1F     | GCGTGC GCGACCTGCTGTACCTGGCGTTCAACCAG  |
|                         | MOC1ΔLHR1R     | CTGGTTGAACGCCAGGTACAGAGGTCCGCGCACGC   |
| <i>BDMOC1ΔVHIID</i>     | MOC1ΔVHIIDF    | CCGGCGTCGTCCGGGGCGGACCGCGACACCCTCCTC  |
|                         | MOC1ΔVHIIDR    | GAGGAGGGTGTTCGCGGTCCGCCCGGACGACGCCGG  |
| <i>BDMOC1ΔPFYRE</i>     | MOC1ΔPFYREF    | CACAACCTGGCCGGCCACGGCGCCGGTGGTGGCGC   |
|                         | MOC1ΔPFYRER    | GCGCCACCACCGCCGCCGTGGCCGGCCAGGTTGTG   |
| <i>BDMOC1ΔLHRII</i>     | MOC1ΔLHRIIF    | GTCACCGCGCCGGCGCCGACGAGCTCGCCCGGTTTC  |
|                         | MOC1ΔLHRIIR    | GAACGCGGCGAGCTCGTCCGGCCCGGCGCCGGTGAC  |
| <i>AD-SLR1N230</i>      | SLR1N230R      | GGAATTCACAACCGGCACGGCGGG              |
| <i>AD-SLR1N297</i>      | SLR1N297R      | GGAATTCGCGGAAGCGGTACACGCG             |
| <i>AD-SLR1N381</i>      | SLR1N381R      | GGAATTCGGGGCCGACGCCGGTGAG             |
| <i>AD-SLR1N456</i>      | SLR1N456R      | GGAATTCGGGCTGCGCGAGCAGCCG             |
| <i>AD-SLR1N550</i>      | SLR1N550R      | GGAATTCCTCCGCGCCCTCGCACGC             |



**Supplementary Table 2. Primers used in this study. (Continued from the previous page)**

| <b>Construct</b>           | <b>Primer</b>         | <b>Sequence (5'-3')</b>                    |
|----------------------------|-----------------------|--------------------------------------------|
| <i>AD-SLR1C395</i>         | SLR1C395F             | GGAATTCCATATGGTGGTTGACACGCAGGAG            |
| <i>AD-SLR1C316</i>         | SLR1C316F             | GGAATTCCATATGGACCTTCTGCACGCCAC             |
| <i>AD-SLR1C243</i>         | SLR1C243F             | GGAATTCCATATGCAGCCGGACGAGACCGAC            |
| <i>AD-SLR1C169</i>         | SLR1C169F             | GGAATTCCATATGGGCGCGCTGGAGAAGGTC            |
| <i>AD-SLR1C75</i>          | SLR1C75F              | GGAATTCCATATGCGCACGGAGCGCCACGAG            |
| <i>AD-SLR1ΔDEA</i>         | SLR1ΔDEAF             | GGGGAGGAGGAGGACGTCGACGTCGCGCAGAAGCTG       |
|                            | SLR1ΔDEAR             | CAGCTTCTGCGCGACGTCGACGTCCTCCTCCTCCCC       |
| <i>AD-SLR1ΔTVP</i>         | SLR1ΔTVPF             | GACGGGTTTCGTGTCGCACAGCATGCTTTCGAGCTC       |
|                            | SLR1ΔTVPR             | GTTGAGCTCGGAAAGCATGCTGTGCGACACGAACCCGTCATC |
| <i>AD-SLR1ΔpolyS/T/V</i>   | SLR1ΔpolySF           | GACCCGTCGGCTGCTGACGGATCCGGCTGGTGAC         |
|                            | SLR1ΔpolySR           | GTGCACCAGCCGATCCCGTCAGCAGCCGACGGGTC        |
| <i>AD-SLR1ΔLHR1</i>        | SLR1ΔLHR1F            | CCCGCCGTGCCGGTTGTGCCCGGGACAGCACCCCTC       |
|                            | SLR1ΔLHR1R            | GAGGGTGCTGTCCGCGGGCACAACCCGGCACGGCGGG      |
| <i>AD-SLR1ΔVHIID</i>       | <i>AD-SLR1ΔVHIIDF</i> | CTCCTCGACGCCCTTCGCCCGCAGCCGGACGAGACCGAC    |
|                            | <i>AD-SLR1ΔVHIIDR</i> | GTCGGTCTCGTCCGGCTGCGGGGCGAAGGCGGCTCGAGGAG  |
| <i>AD-SLR1ΔLHRII</i>       | <i>AD-SLR1ΔLHR1IF</i> | ACCGGCGTCGGCCCCCGGGCGCGCTGGAGAAGGTC        |
|                            | <i>AD-SLR1ΔLHR1IR</i> | GACCTTCTCCAGCGCGCCCGGGGGCCGACGCCGGT        |
| <i>AD-SLR1ΔPFYRE</i>       | <i>AD-SLR1ΔPFYREF</i> | CGGCTGCTCGCGCAGCCCCGCACGGAGCGCCACGAG       |
|                            | <i>AD-SLR1ΔPFYRER</i> | CTCGTGGCGCTCCGTGCGGGGCTGCGCGAGCAGCCG       |
| <i>AD-SLR1ΔSAW</i>         | <i>AD-SLR1ΔSAWF</i>   | GTGGCGTGCAGGGGCGCGGAGGCCGCGCGGAATTCC       |
|                            | <i>AD-SLR1ΔSAWR</i>   | GGAATTCGCGCGGGCCTCCGCGCCCTCGCACGCCAC       |
| <i>AD-SLR1ΔLHR1+VHIID</i>  | SLR1ΔL1VF             | CCCGCCGTGCCGGTTGTGCCGACCCGGACGAGACC        |
|                            | SLR1ΔL1VR             | GGTCTCGTCCGGCTGCGGCACAACCCGGCACGGCGGG      |
| <i>AD-SLR1ΔVHIID+LHRII</i> | SLR1ΔVL2F             | CTCGACGCCGCTTCGCCGGCGCGCTGGAGAAGGTC        |
|                            | SLR1ΔVL2R             | GACCTTCTCCAGCGCGCCGCGAAGGCGGCGTCGAG        |
| <i>ADSLR1ΔLHRII+PFYRE</i>  | SLR1ΔL2PF             | ACCGGCGTCGGCCCCCGCGCACGGAGCGCCACGAG        |
|                            | SLR1ΔL2PR             | CTCGTGGCGCTCCGTGCGGGGGGGCCGACGCCGGT        |
| <i>GID1-CRISPR</i>         | <i>GID1-CRISPRF</i>   | CAGTGTCTGACAACATTCTGCGG                    |
|                            | <i>GID1-CRISPRR</i>   | AACCCGCAGAATGTTGTACGACA                    |
| <i>MOC1-CRISPR</i>         | <i>MOC1-CRISPRF</i>   | CAGGAAGTGGAAGGGGAGGTGGA                    |
|                            | <i>MOC1-CRISPRR</i>   | AACTCCACCTCCCCTTCCACTTC                    |
|                            | QSLR1F                | GCTCCAATGCCTACAAACA                        |
|                            | QSLR1R                | TTCTCCTCCACCCGGTAG                         |
|                            | QOsUbqF               | AACCAGCTGAGGCCAAGA                         |
|                            | QOsUbqR               | ACGATTGATTAAACCAGTCCATGA                   |
